# Supplementary material for: Integrative Analysis of Metabolomic and Transcriptomic Data Reveals the Mechanism of Color Formation in Corms of Pinellia ternata
Source: MDPI journal article supplement (doi:10.3390/ijms24097990), 2023-04-28
Supplement: s1 [file s1]

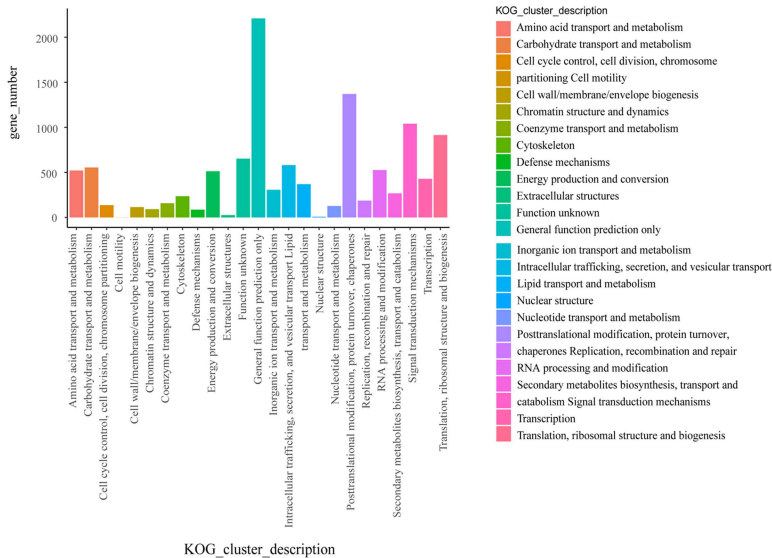

Figure S3. All transcripts were assigned to database KOG and classified into 25 functional categories.
