# Supplementary figures and images for: Integrative Analysis of Metabolomic and Transcriptomic Data Reveals the Mechanism of Color Formation in Corms of Pinellia ternata
Source: MDPI journal article supplement (doi:10.3390/ijms24097990), 2023-04-28

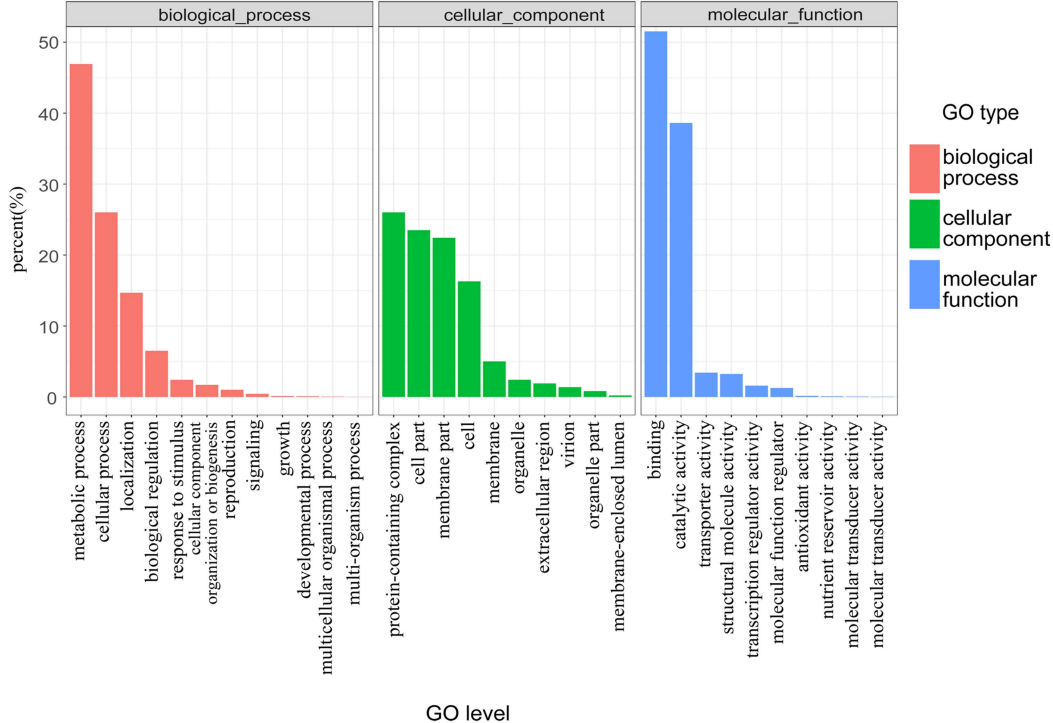

Figure S4. All transcripts were assigned to database GO.

Supplement: s1 [file s1]

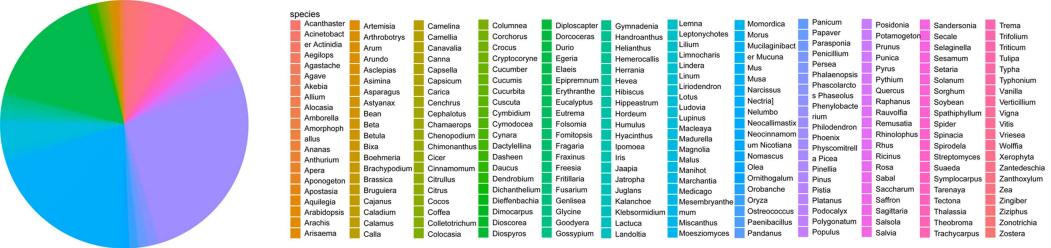

Figure S2. All transcripts were assigned to database Nr.

Supplement: s1 [file s1]

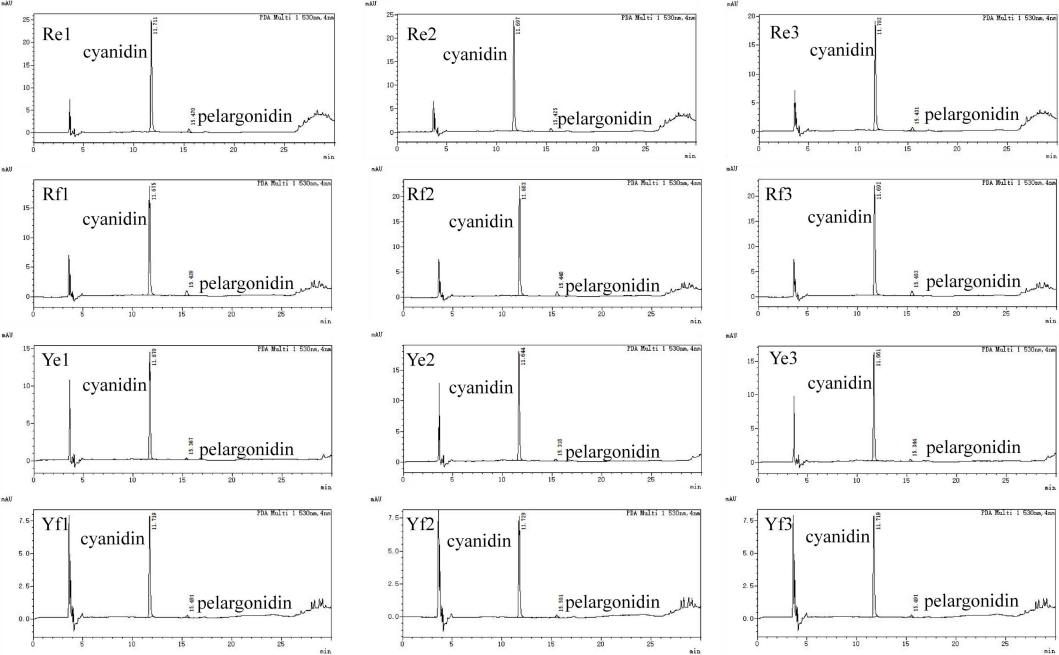

Figure S6. HPLC profile of 12 samples.

Supplement: s1 [file s1]
